# Supplementary material for: Cellulose–TBPH interactions from diffusion NMR, rheology and SAXS studies
Source: Research Square preprint supplement (doi:10.21203/rs.3.rs-6993367/v1), 2025-08-14
Supplement: Supplementary file 1 [file 0e52fc45e128a429cb616f29.docx]

Cellulose–TBPH interactions from diffusion NMR, rheology and SAXS studies: supporting information

Soline Quilliard1☆, Djibril Rouzaud2☆, Cassandre Kouvatas2*, Philippe Bazin2, Arnaud Prigent1, Arnaud Travert2 , BenoitDuchemin1*

1 Université Le Havre Normandie, Normandie Université, Laboratoire Ondes et Milieux Complexes (LOMC UMR6294)

2 Laboratory of catalysis and spectrochemistry (LCS UMR 6506), University of Caen Normandy

* Corresponding authors : [cassandre.kouvatas@ensicaen.fr](mailto:cassandre.kouvatas@ensicaen.fr); benoit.duchemin@univ-lehavre.fr

☆ : these authors contributed equally

*Tables S1.Fitting parameters and results from the data treatment of the rheological measurements:*

| MCC160 Fitting results PL | | |
| --- | --- | --- |
| C (wt.%) | K (mPa.s1-n) | n |
| 10 | 4220 ± 1 | 0.8062 ± 0.00009 |
| 7,5 | 884.0 ± 0.65 | 0.9301 ± 0.0002 |
| 5 | 172.78 ± 0.3 | 0.9482 ± 0.0004 |
| 3 | 62.36 ± 0.31 | 0.984 ± 0.001 |
| 2 | 30.89 ± 0.54 | 0.9933 ± 0.0036 |
| 1 | 19.92 ± 0.45 | 0.9968 ± 0.0040 |
| 0,5 | 18.12 ± 0.63 | 0.9973 ± 0.0051 |
| 0,1 | 11.79 ± 0.64 | 0.9951 ± 0.0080 |
| TBPH (40 wt.% aq.) | 9.94 ± 0.27 | 0.9984 ± 0.0045 |

| MCC680 Fitting results CY | | | | | |
| --- | --- | --- | --- | --- | --- |
| C  (wt.%) | η0 (mPa) (×103) | ηinf (mPa) | λ (s-1) | a | n |
| 10 | 125.7±6.6 | 9.83±1478 | 0.36±0.38 | 0.53 ± 0.20 | 0.08±0.93 |
| 7.5 | 682.3± 0.0005 | 4.76×10-13 ± 9.2×104 | 7.53 ±2.19 | 3.99 ± 0.85 | 0.50 ± 0.22 |
| 5 | 44.19±0.03 | 9.8 ± 22.8 | 0.188±0.005 | 0.570 ± 0.003 | 0.308 ± 0.007 |
| 3 | 28.08±0.24 | 10.16 ± 10.49 | 0.65 ± 0.05 | 0.578 ± 0.007 | 0.391 ± 0.01 |
| 2 | 3.554 ±0.014 | 10.17 ± 2.32 | 0.172±0.013 | 0.509 ± 0.006 | 0.491 ± 0.007 |
| MCC680 Fitting results PL | | | | | |
| C (wt.%) | K (mPa.s) | | n | | |
| 1 | 63.28 ± 0.30 | | 0.989 ± 0.0015 | | |
| 0,5 | 36.11 ± 0.23 | | 0.9933 ± 0.0017 | | |
| 0,1 | 13.19 ± 0.19 | | 0.9954 ± 0.0035 | | |

| Fitting results MCC680 | | | | | |
| --- | --- | --- | --- | --- | --- |
| Two Power laws | | Huggins equation | | Lyons-Tobolsky | |
| *R2* | 0.94 | *R2* | 0.99 | *R2* | 0.008 |
| *a(C<C*)* | 0.61 ± 0.30 | *[η]* | 487 ± 25 | *[η]* | (6.68 ± 2.40) × 102 |
| *ln(KMb)(C<C*)* | 6.8 ± 1.9 | *kH* | 0.029 ± 0.014 | *kH* | 0.121 ±0.077 |
| *a(C>C*)* | 3.5 ± 0.3 |  |  | *b* | 0 ± 4 |
| *ln(KMb)(C>C*)* | 21.4 ± 1.1 |  |  |  |  |
| *c** | (0.67 ± 0.14)×10-2 |  |  |  |  |

| Fitting results MCC160 | | | | | |
| --- | --- | --- | --- | --- | --- |
| Two Power laws | | Huggins equation | | Lyons-Tobolsky | |
| *R2* | 0.98 | *R2* | 0.87 | *R2* | 0.99 |
| *a(C<C*)* | 0.29 ± 0.16 | *[η] (mL.g-1)* | 105 ± 11 | *[η] (mL.g-1)* | 116 ± 25 |
| *ln(KMb)(C<C*)* | 4.5 ± 0.8 | *kH* | 0 ± 0.06 | *kH* | 0.126 ±0.075 |
| *a(C>C*)* | 3.3 ± 0.4 |  |  | *b* | 5.04 ± 1.70 |
| *ln(KMb)(C>C*)* | 15.2 ± 1.1 |  |  |  |  |
| *c** | (2.7 ± 0.5)×10-2 |  |  |  |  |

| **Fitting methods parameters** | | | | | | | | | | | | | | |
| --- | --- | --- | --- | --- | --- | --- | --- | --- | --- | --- | --- | --- | --- | --- |
| **Ostwald –de Waele law** | | | | **Carreau-Yasuda** | | | | | | **least_square()** | | | | |
|  | lower lim | upper lim | start values |  | lower lim | upper lim | | start values | | *method*: | trf' | *xtol:* | | 1,00E-15 |
| *K* | 9 | inf | 10 | *n0* | 0 | 10*var | | var | | *jac:* | 3-point' | *ftol:* | | 1,00E-15 |
| *n* | -1,1 | 1,1 | 1 | *ninf* | 9,5 | 10,5 | | 10 | | *loss:* | soft_l1' | *gtol:* | | 1,00E-15 |
|  | | | | *lambda* | 0 | | 10 | | 1,1 | *max_nfev:* | 100000 | |  | |
| *a* | 0 | | 10 | | 1 |  | | | | |
| *n* | 0 | | 10 | | 1 |
| **MCC160: Two Power laws** | | | | **MCC160: Lyons-Tobolsky** | | | | | | **MCC160: Huggins** | | | | |
|  | lower lim | upper lim | start values |  | lower lim | upper lim | | Start values | |  | lower lim | upper lim | | Start values |
| *a(C<C*)* | 0 | 10 | 1 | *[η]* | 20 | 1000 | | 20 | | *[η]* | 10 | 500 | | 120 |
| *ln(KMb)(C<C*)* | 0 | 100 | 3 | *kH* | 0,05 | 6 | | 1 | | *kH* | 0 | 10 | | 0,5 |
| *a(C>C*)* | 0 | 10 | 3 | *b* | 0 | 5000 | | 32 | |  | | | | |
| *ln(KM^b)(C>C*)* | 0 | 100 | 15 |  | | | | | |
| **MCC680: Two Power laws** | | | | **MCC680: Lyons-Tobolsky** | | | | | | **MCC680: Huggins** | | | | |
|  | lower lim | upper lim | start values |  | lower lim | upper lim | | start values | |  | lower lim | upper lim | | start values |
| *a(C<C*)* | 0 | 10 | 1 | *vint* | 50 | 1000 | | 200 | | *vint* | 10 | 500 | | 200 |
| *ln(KM^b)(C<C*)* | 0 | 100 | 3 | *kH* | 0,1 | 6 | | 1 | | *kH* | 0 | 10 | | 0,5 |
| *a(C>C*)* | 0 | 10 | 3 | *b* | 0 | 5000 | | 32 | |  | | | | |
| *ln(KM^b)(C>C*)* | 0 | 1000 | 15 |  | | | | | |
|  |  |  |  |  |  |  |  |  |  |  |  |  |  |  |

*Table S2: Fitting parameters entered in SASView guinier_porod model and optimized results:*

| MCC160 | | | | | | |
| --- | --- | --- | --- | --- | --- | --- |
| Concentration (wt.%) | | 2 | 3 | 5 | 7.5 | 10 |
| Scale | result | 13.5 ± 4.3 | 48.2 ± 9.1 | 136 ± 133 | 125 ± 33 | 23.5 ± 2.7 |
| lower limit | 0.0 | 0.0 | 0.0 | 0.0 | 0.0 |
| upper limit | +∞ | +∞ | +∞ | +∞ | +∞ |
| Background | result | 2.6012 * | 3.18 ± 0.06 | 2.67 ± 0.06 | 1.68 ± 0.06 | 2.82 ± 0.06 |
| lower limit | -∞ | -∞ | -∞ | -∞ | -+∞ |
| upper limit | +∞ | +∞ | +∞ | +∞ | +∞ |
| rg | result | 21.4 ± 1.4 | 31.2 ± 0.9 | 48.1 ± 6.1 | 39.2 ±1.5 | 25.8 ± 0.6 |
| lower limit | 0.0 | 0.0 | 0.0 | 0.0 | 2.0 |
| upper limit | +∞ | +∞ | +∞ | +∞ | +∞ |
| s | result | 0.0 ± 0.09 | 0.0 ± 0.05 | 0.0 ± 0.24 | 0.0 ± 0.07 | 0.24 ± 0.03 |
| lower limit | 0.0 | 0.0 | 0.0 | 0.0 | 0.0 |
| upper limit | +∞ | +∞ | +∞ | +∞ | ++∞ |
| porod_exp | result | 2.13 ± 0.07 | 2.58 ± 0.06 | 1.88 ± 0.01 | 1.93 ± 0.01 | 2.81 ± 0.07 |
| lower limit | 0.0 | 0.0 | 0.0 | 0.0 | 0.0 |
| upper limit | 4 | +∞ | +∞ | +∞ | +∞ |

(*) parameter not optimized

*Figures S3: Micrographies obtained by POM*

| MCC160 in TBPH(aq) 40 wt.% | |
| --- | --- |
| 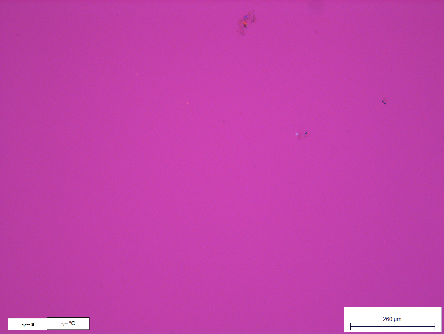 | 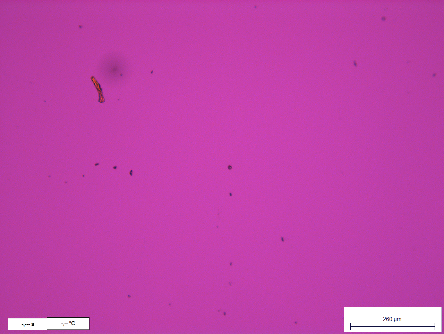 |
| 0.5 wt.% | 1 wt.% |
| 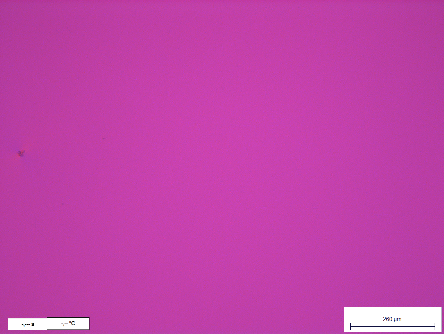 | 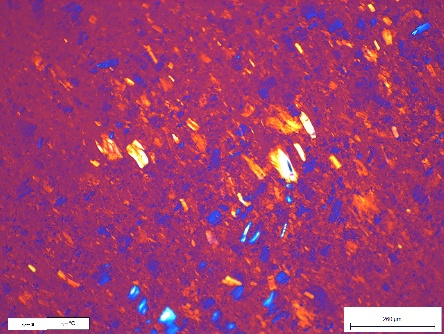 |
| 5 wt.% | 10 wt.% |

| MCC680 TBPH(aq) 40 wt.% | | |
| --- | --- | --- |
| 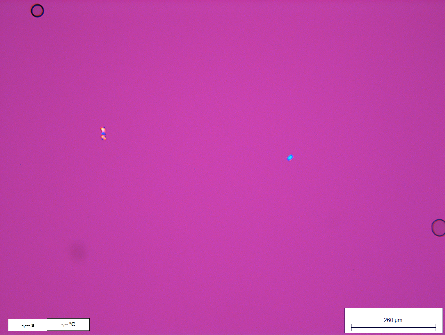 | 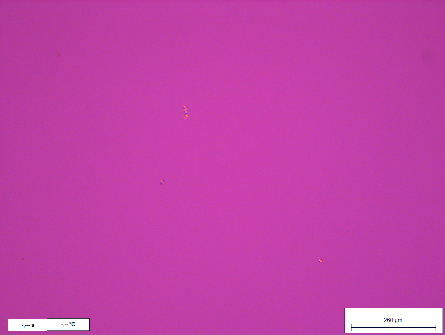 | 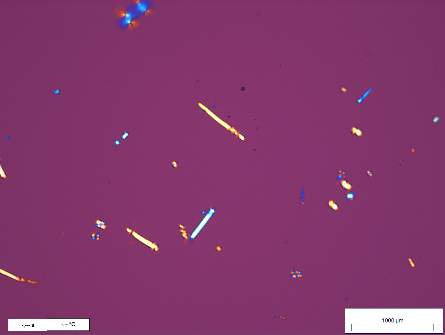 |
| 0.5 wt.% | 1 wt.% | 3 wt.% |
| 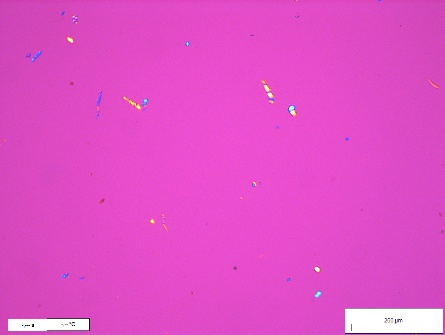 | 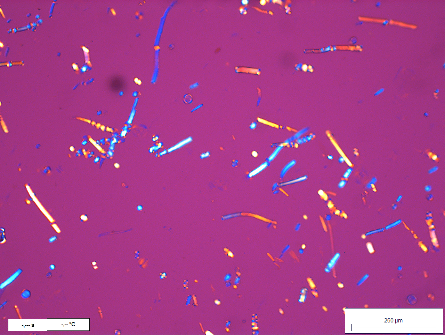 | 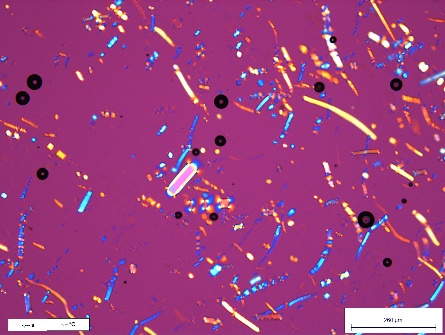 |
| 5 wt.% | 7.5 wt.% | 10 wt.% |

| 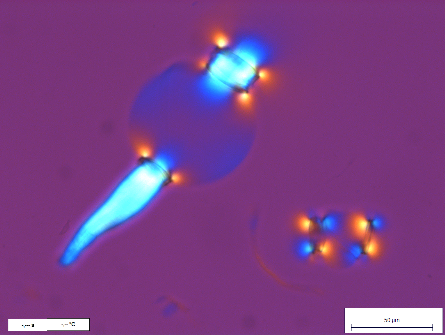 | 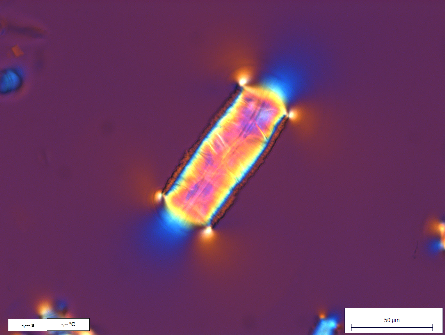 | 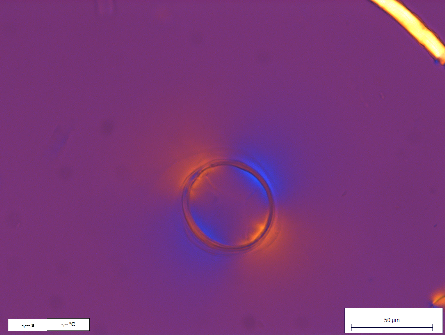 |
| --- | --- | --- |
| Balooning seen in MCC680 solution at 5wt.% | MCC680 5 wt.% | MCC680 5 wt.% |
| 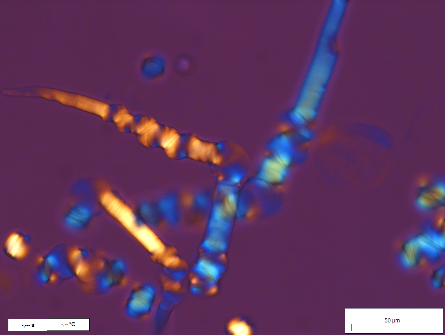 | 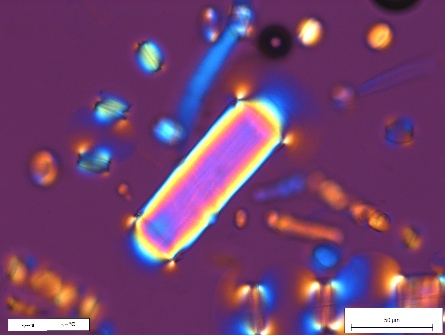 |  |
| Balooning from MCC680 7.5 wt.% solution | MCC680 10 wt.% |  |

*
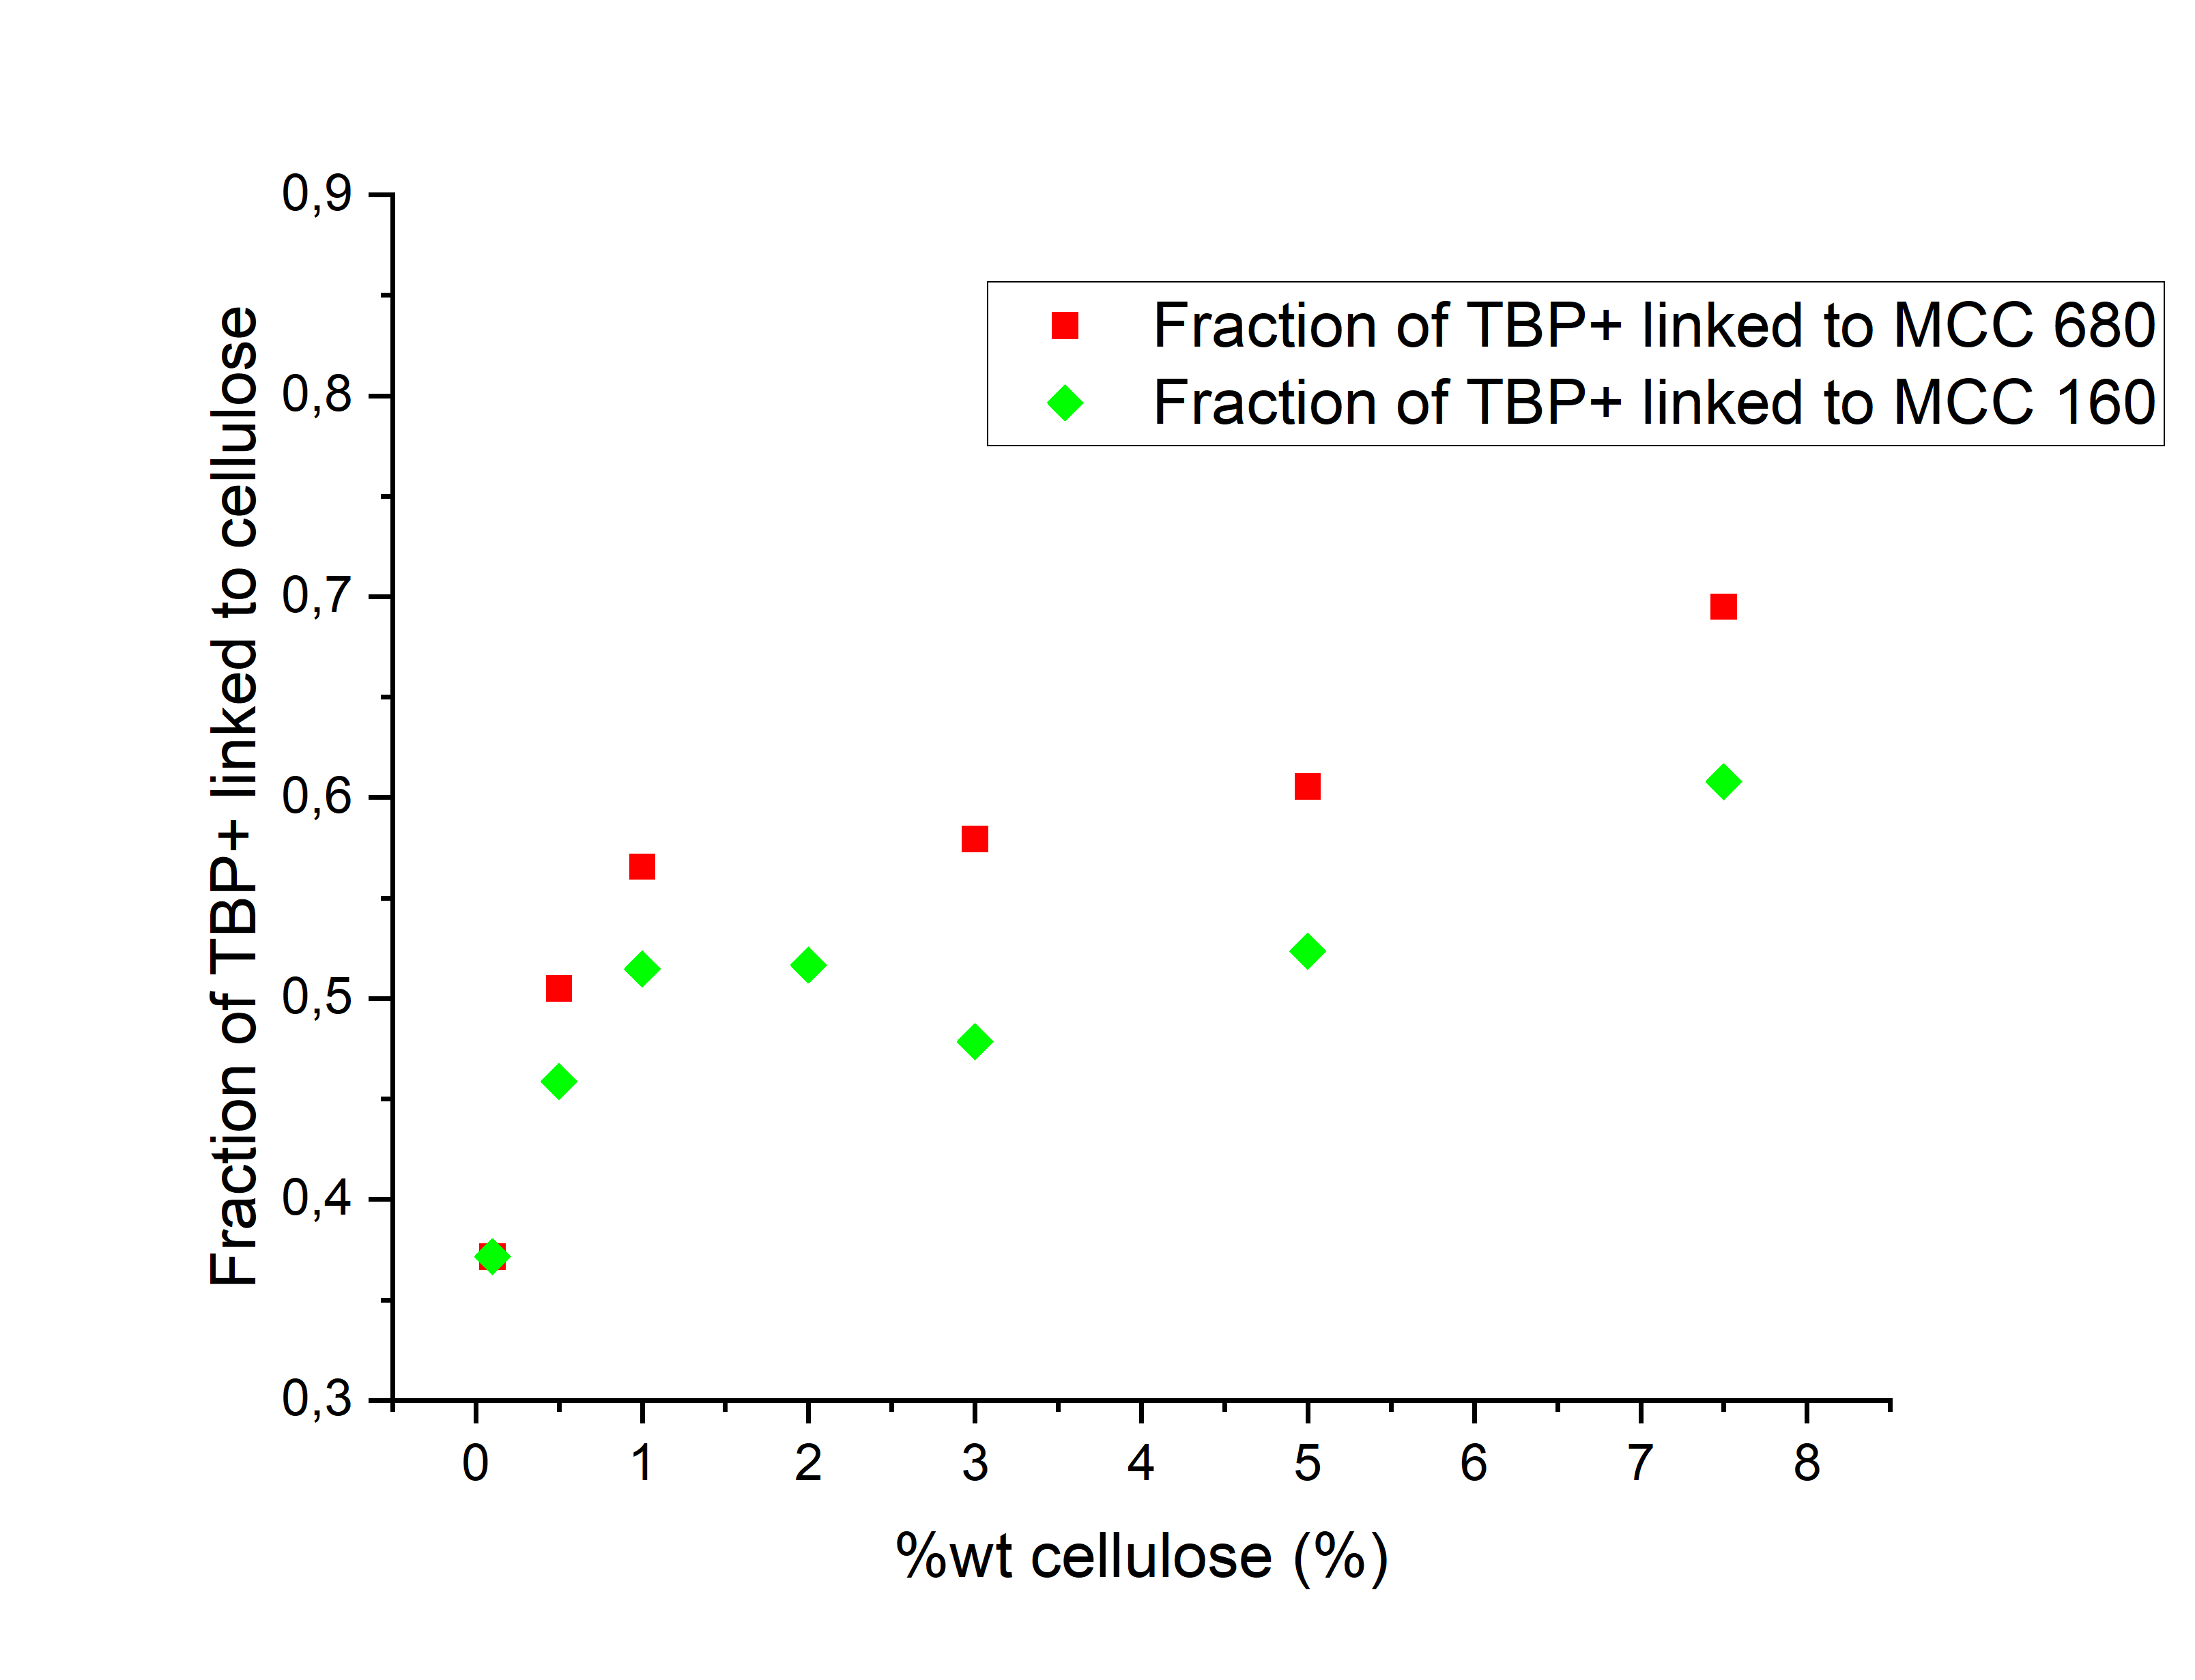
Support Figure S4 fraction of bounded TBP+ ions to cellulose for both MCC 680 (red squares) and MCC 160 (green diamonds) at different cellulosic concentrations*

*Support Figure S5 Linearization of Stejskal-Tanner's equation for cellulose signals at 7.5%wt of MCC 160. It shows 2 components within the exponential decay, corresponding to 2 diffusivities for cellulose within the solution*


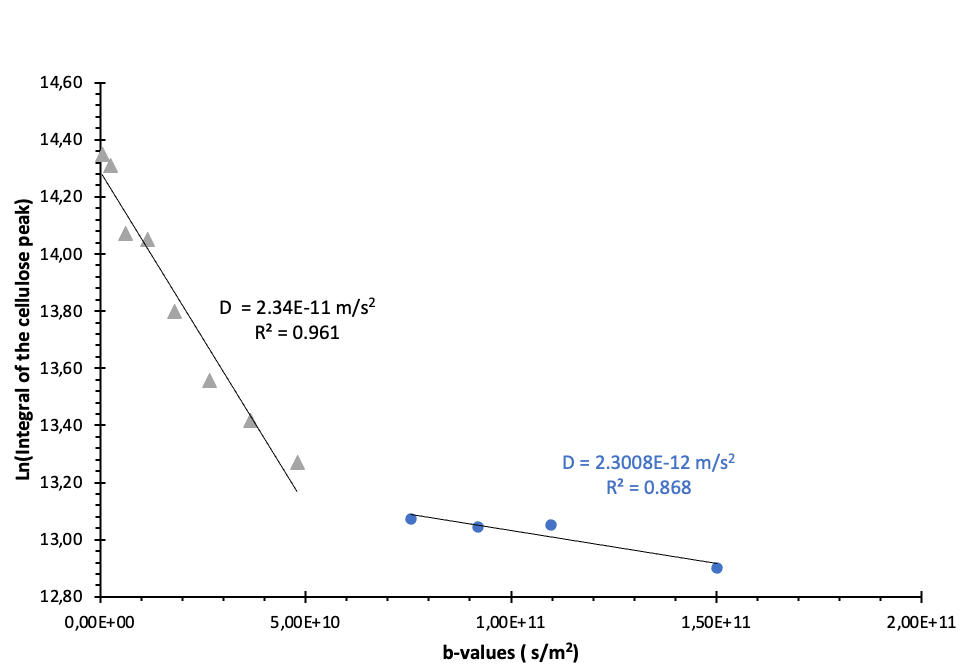


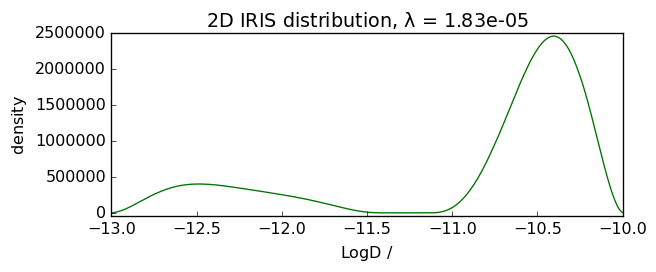


Support Figure S6 Diffusivity distribution for cellulose in the solution of MCC 160 at 7.5%wt in TBPH


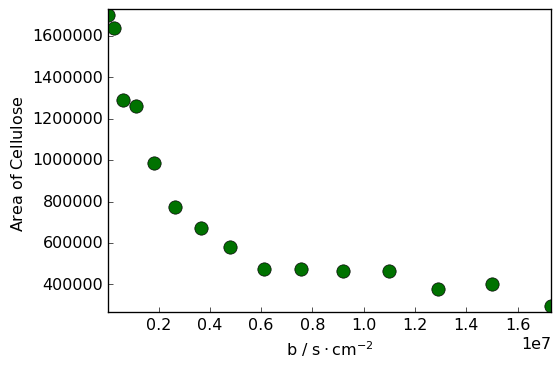


Figure S7 Exponential decay of the signal for cellulose in the solution of MCC 160 at 7.5%wt in TBPH

Figure S8: A picture of a 8mm NMR tube, and a 13C NMR insert. The heterogeneous portion of the tube is delimited by a red box. The portion of the tube where the diffusion experiment takes place is limited by blue lines. The heterogenous part is never considered during the diffusion experiments


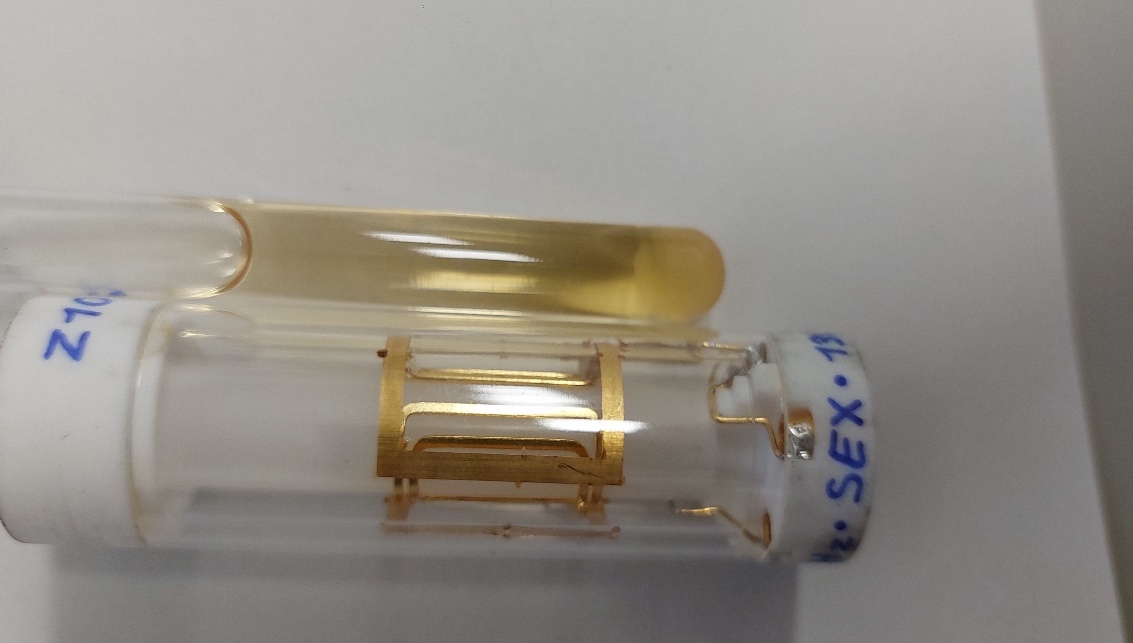


Probed zone

Heterogenous zone


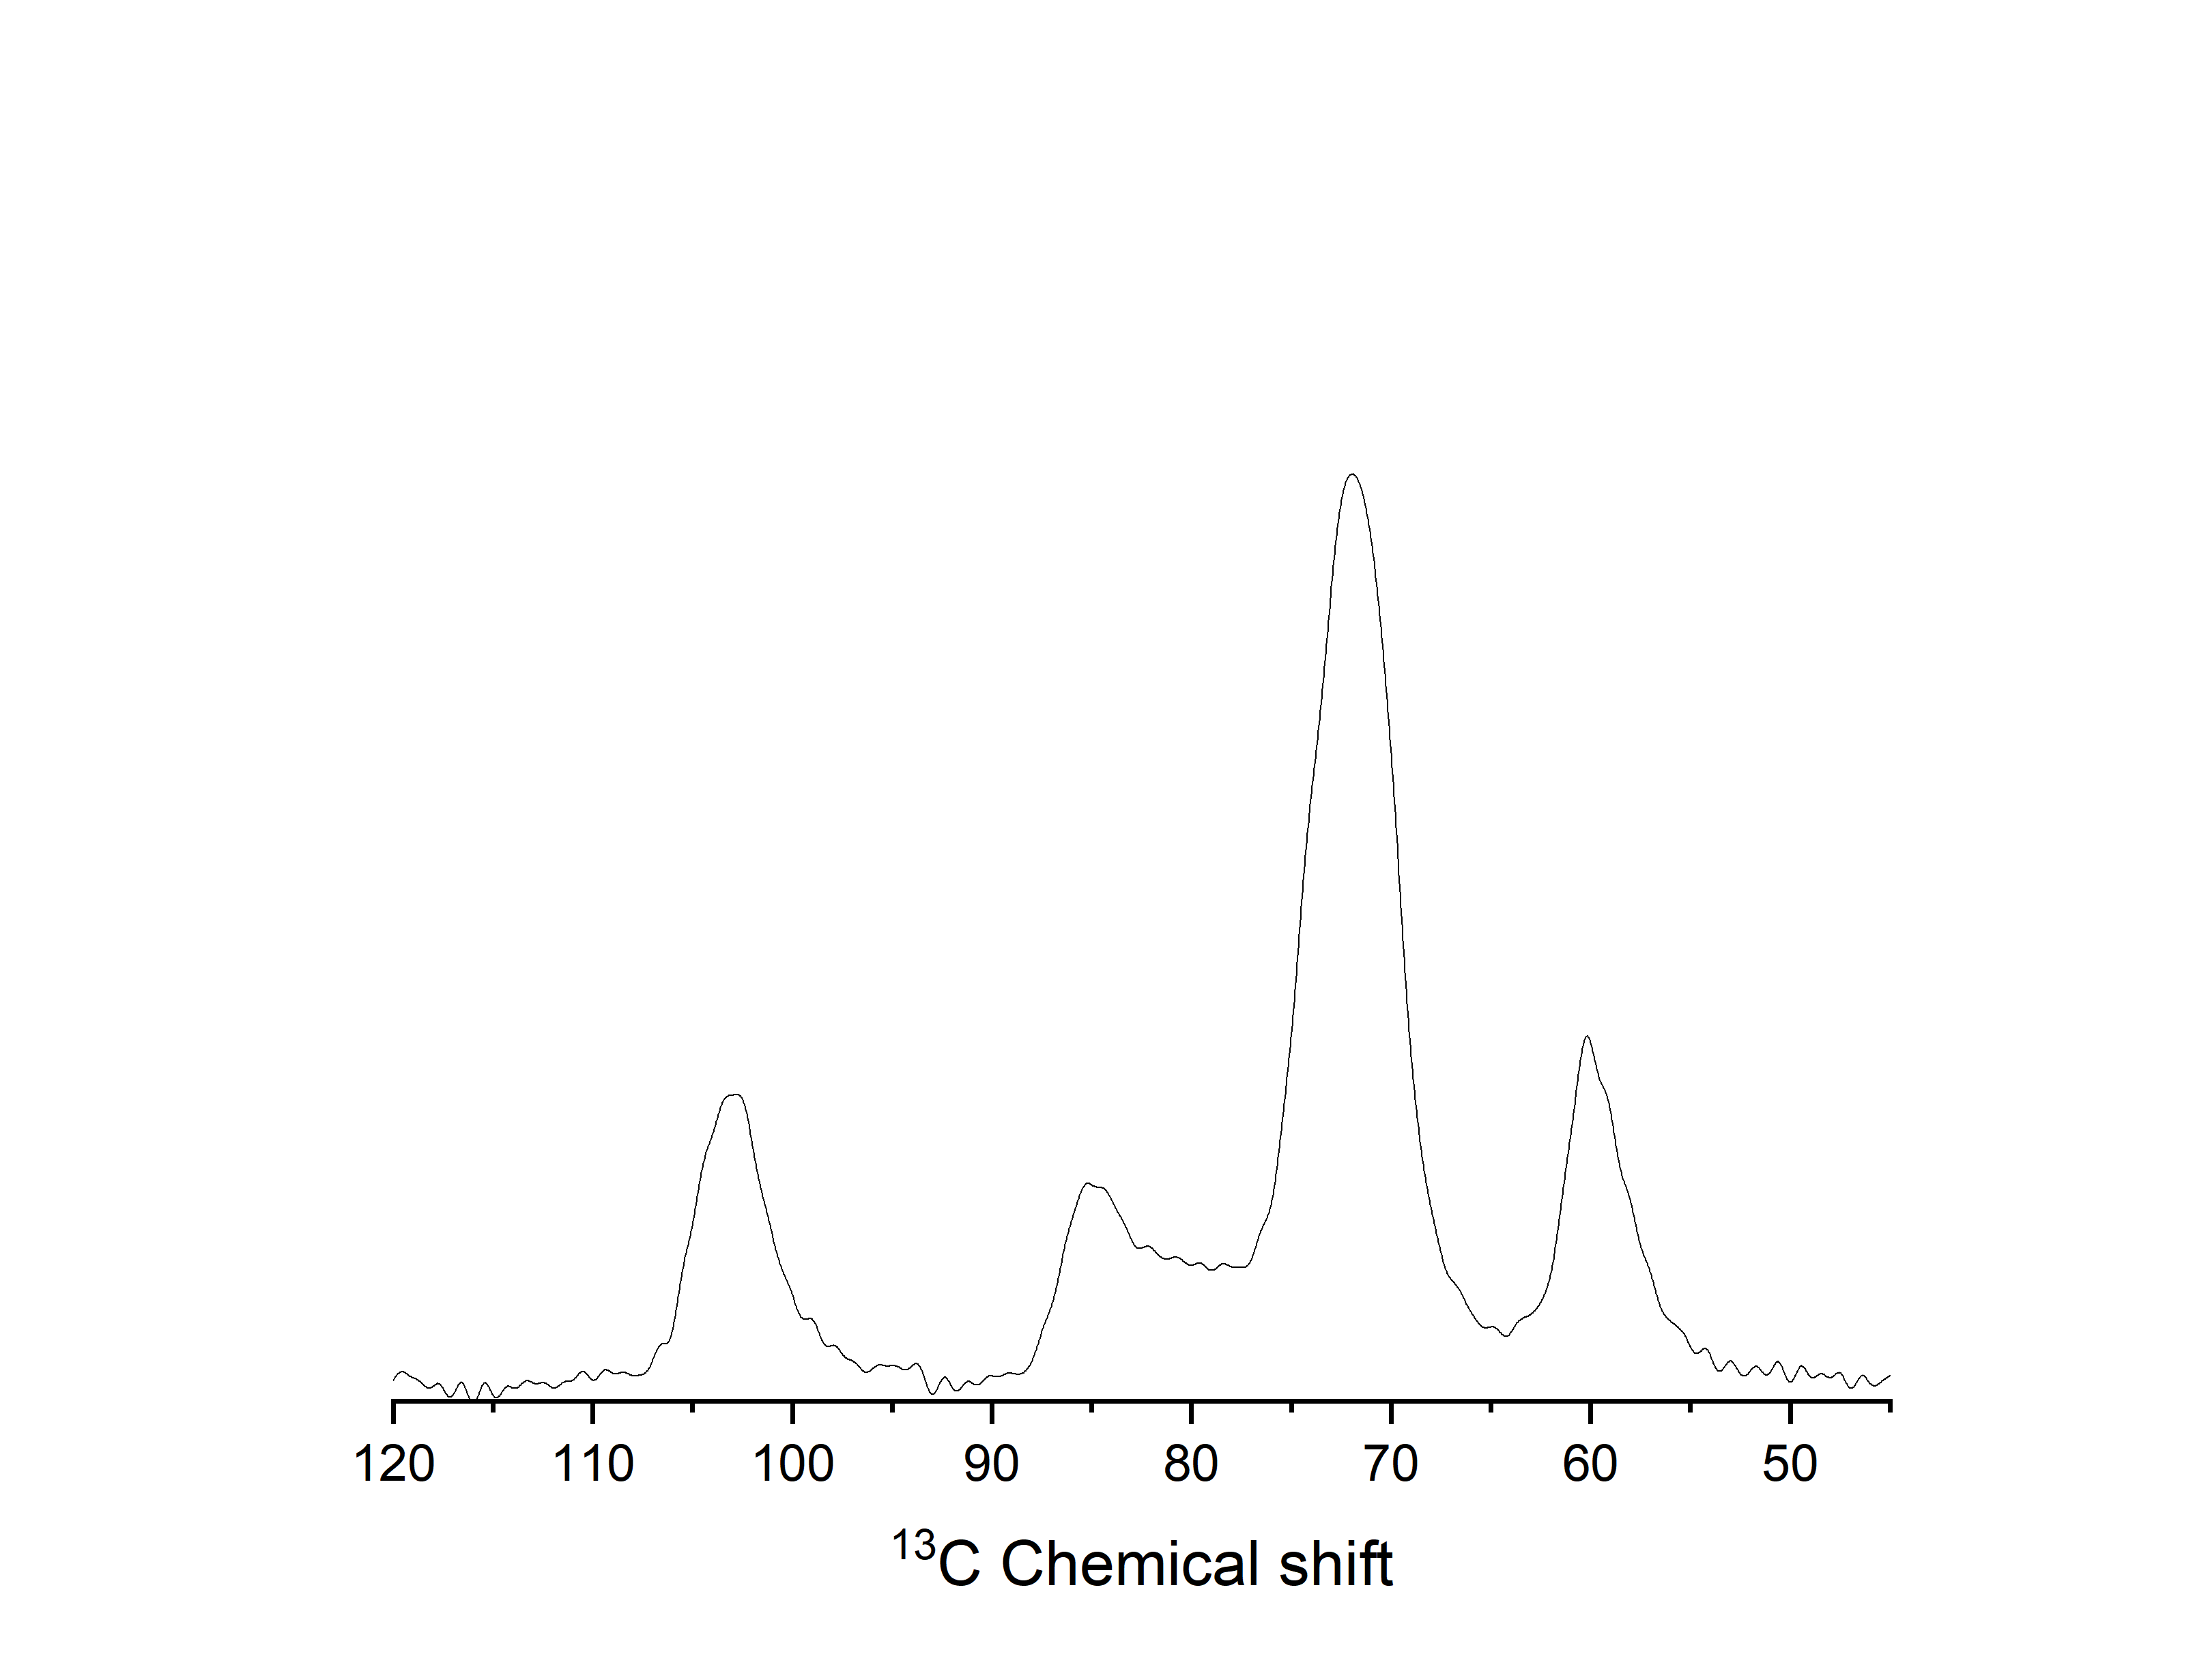


C1

C6

C2,3,5

C4

Figure S9 13C CP MAS NMR of a dried cellulosic sample of 3%wt of MCC 680 in TBPH at a spin rate of 5kHz, a contact time of 1000us , an acquisition time of 0.04s, D1 = 5s and 4096 scans


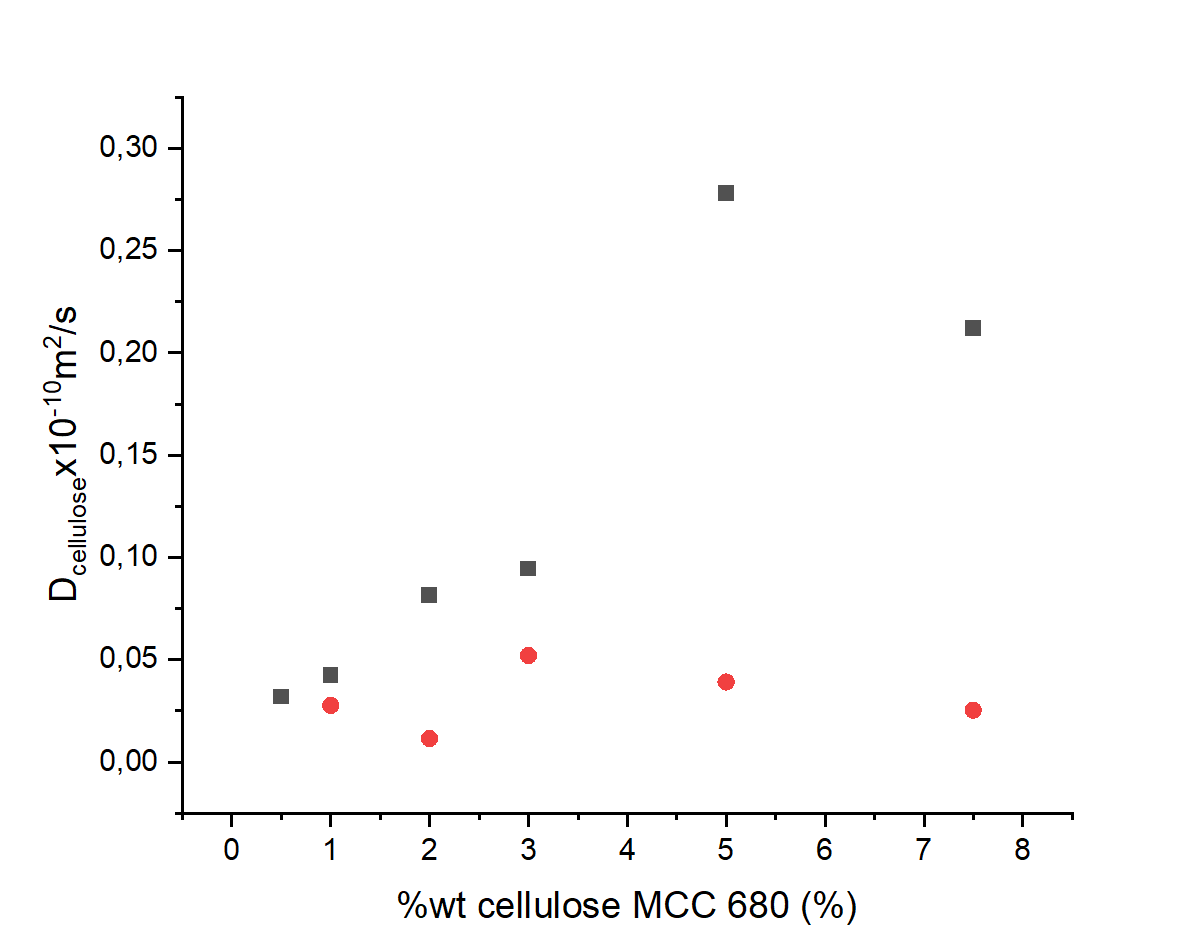
 *Figure S10 linearization of cellulose’s echo decay in function of the weight percentage of MCC 680. Both fast (black squares) and slow (red circles) are represented*


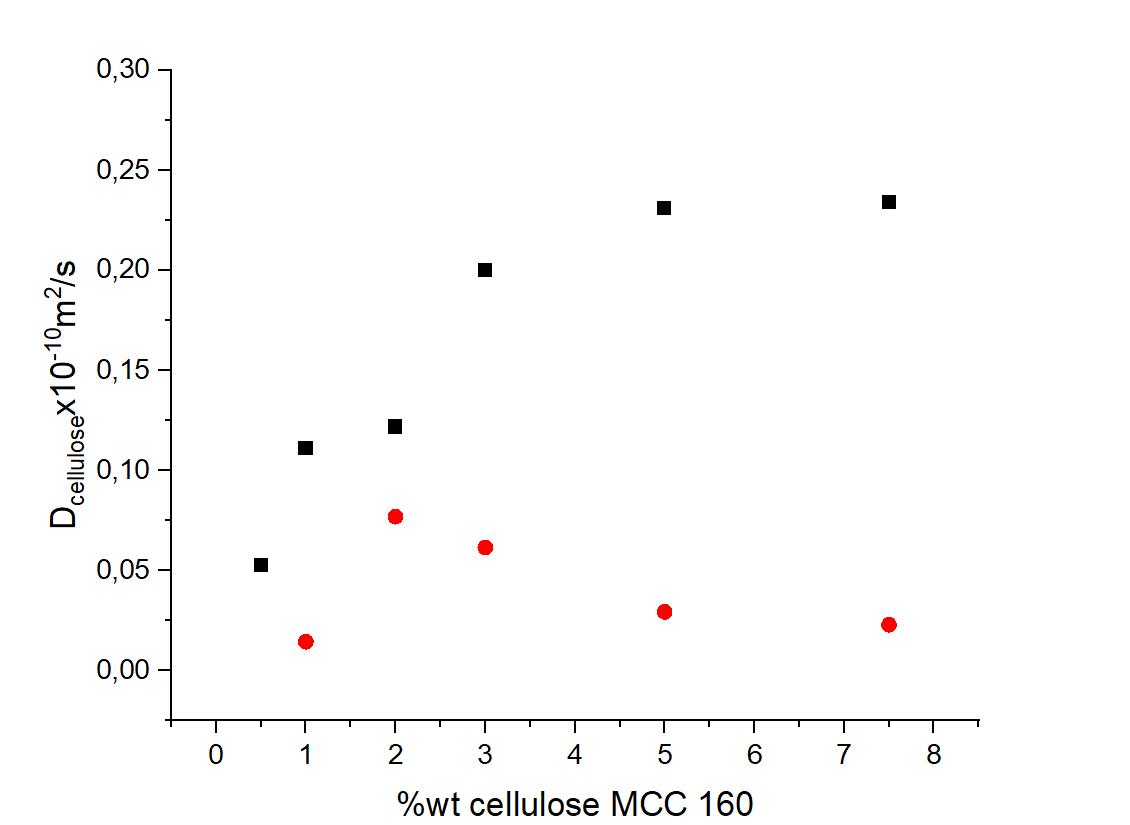


*Figure S11 linearization of cellulose’s echo decay in function of the weight percentage of MCC 680. Both fast (black squares) and slow (red circles) are represented*


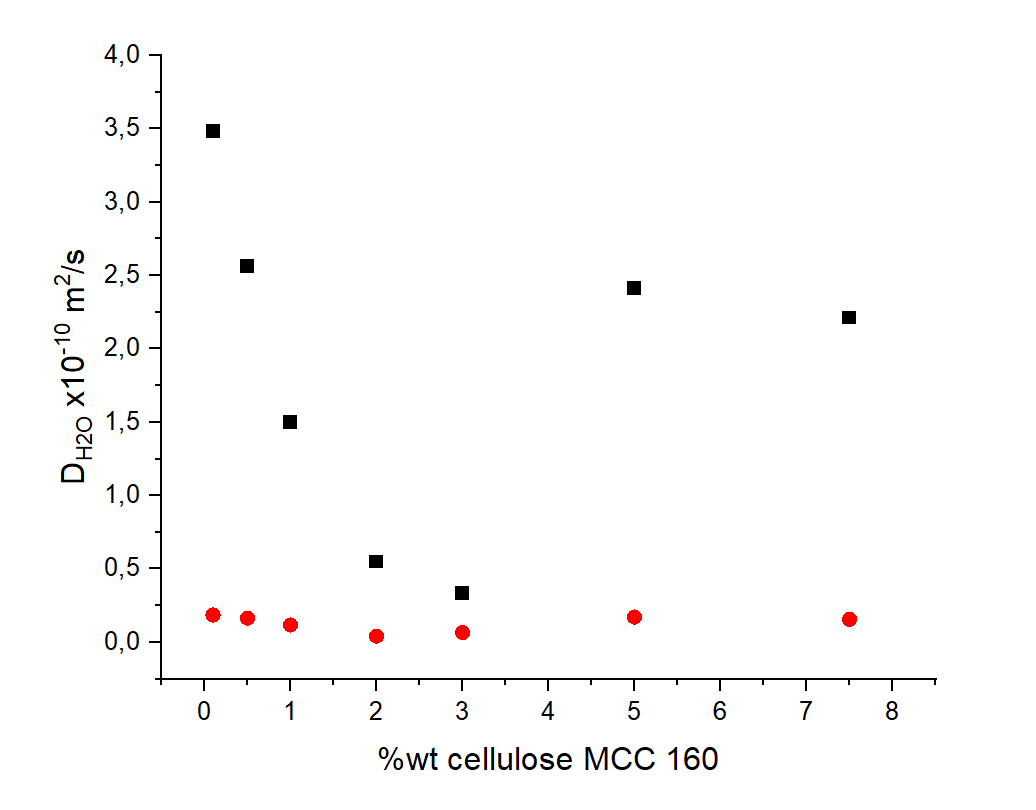


*Figure S12 linearization of water’s echo decay in function of the weight percentage of MCC 160. Both fast (black squares) and slow (red circles) are represented*


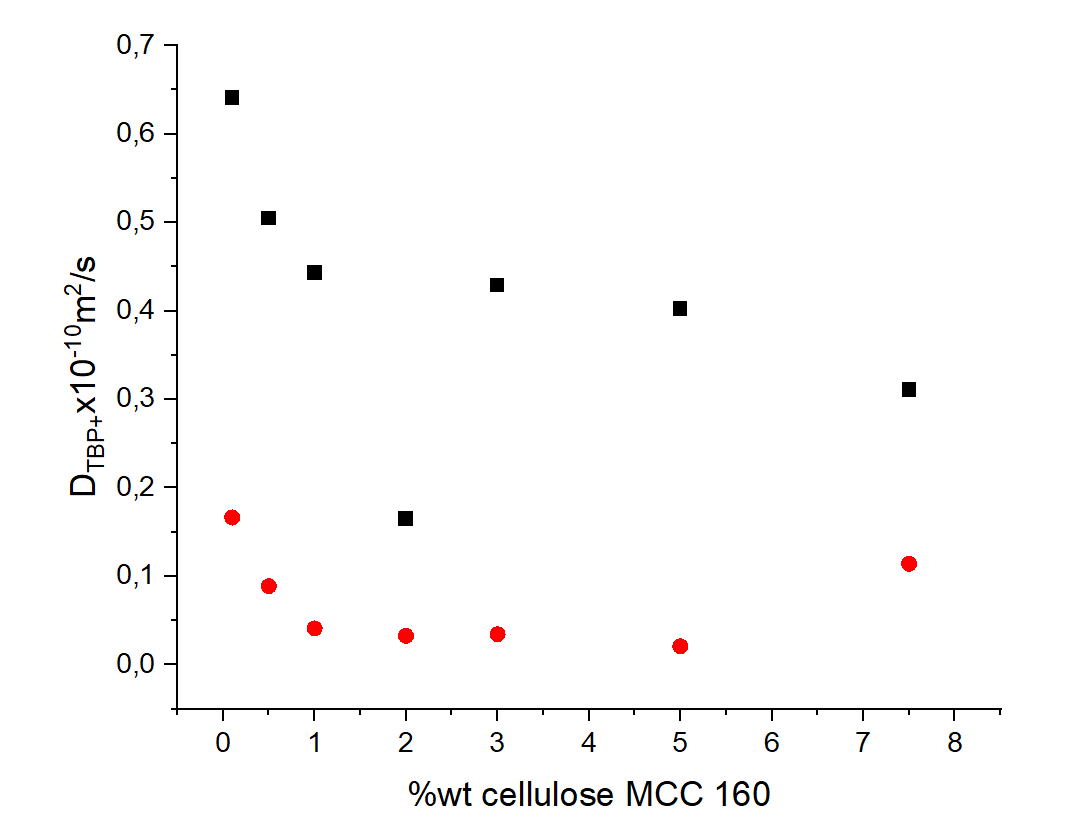
*Figure S13 linearization ofTBP+ echo decay in function of the weight percentage of MCC 160. Both fast (black squares) and slow (red circles) are represented*


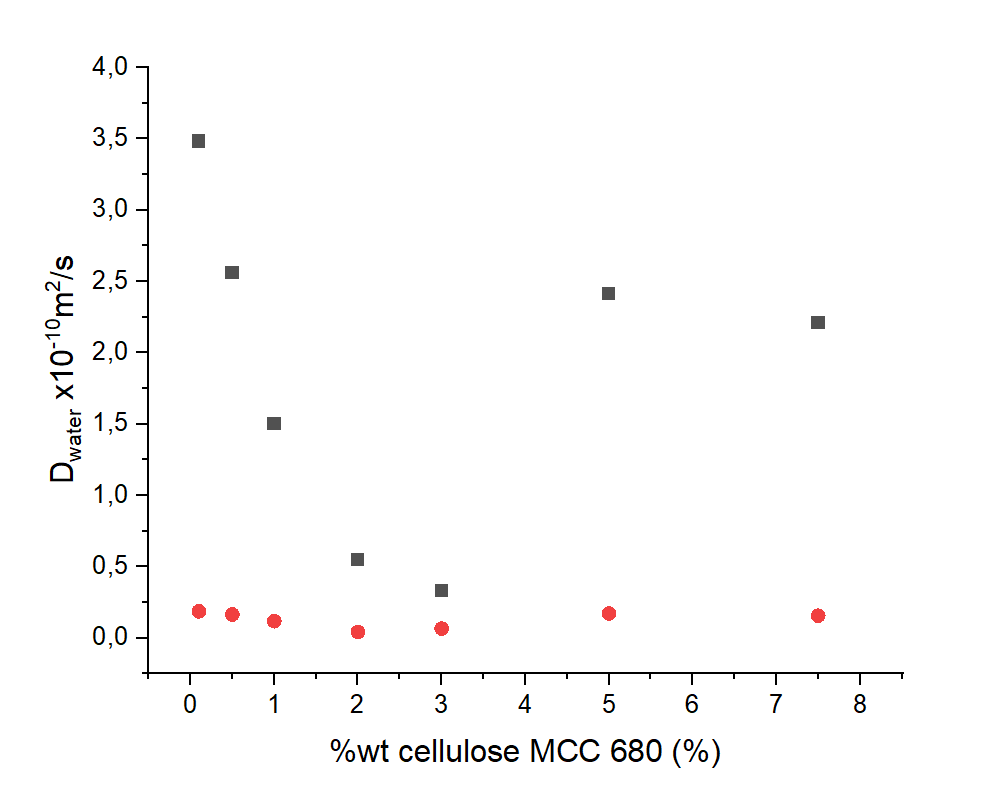
 *Figure S14 linearization of water’s echo decay in function of the weight percentage of MCC 680. Both fast (black squares) and slow (red circles) are represented*


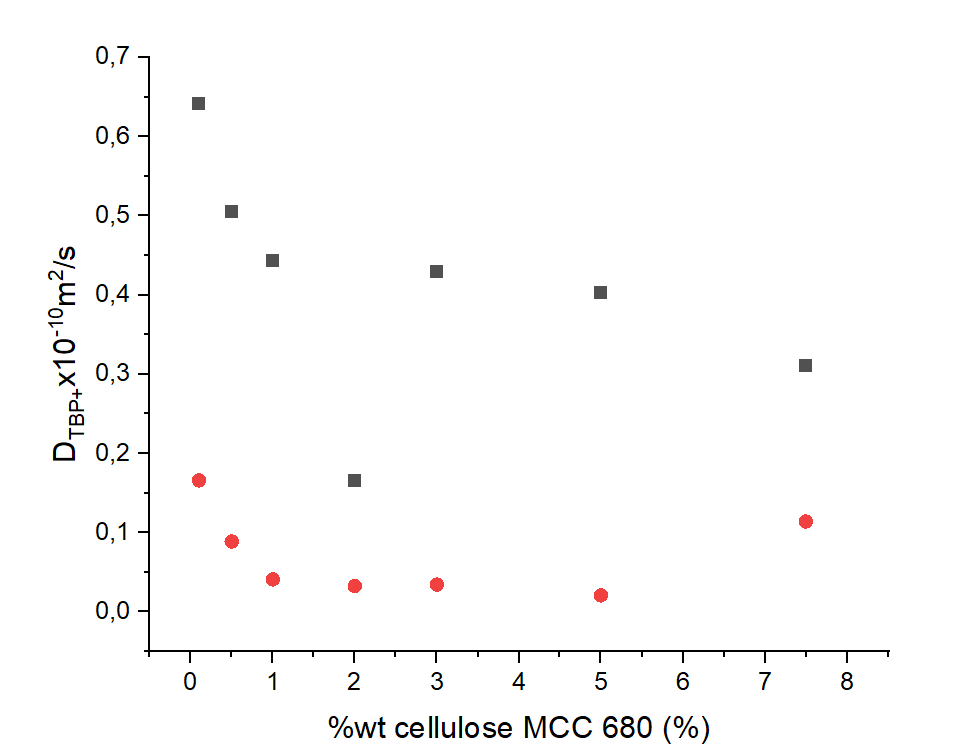
*Figure S15 linearization of TBP+ echo decay in function of the weight percentage of MCC 680. Both fast (black squares) and slow (red circles) are represented*


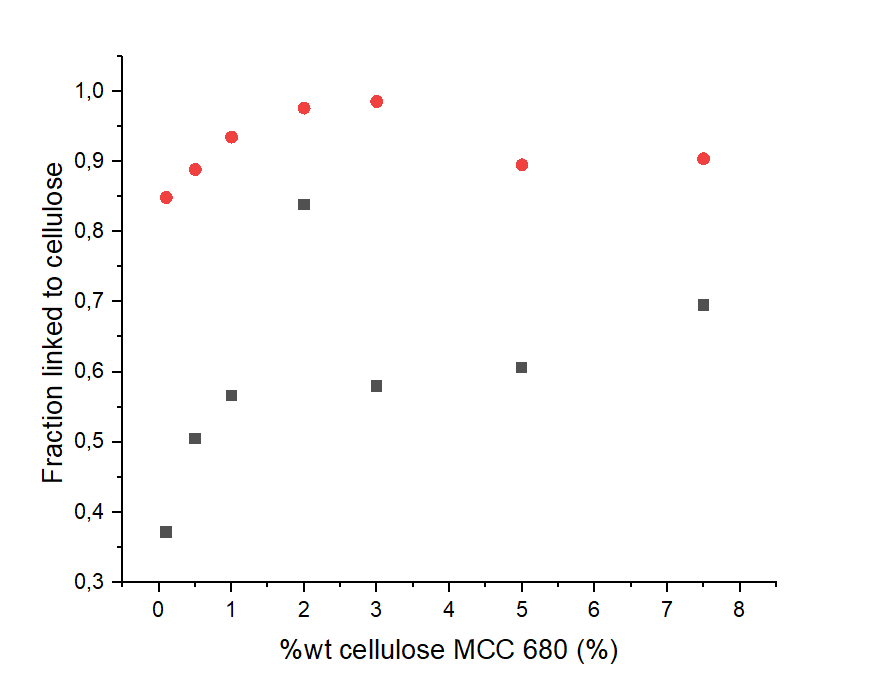


*Figure S16 fraction of water (red circles) and of TBP+ (black squares) linked to MCC 680*


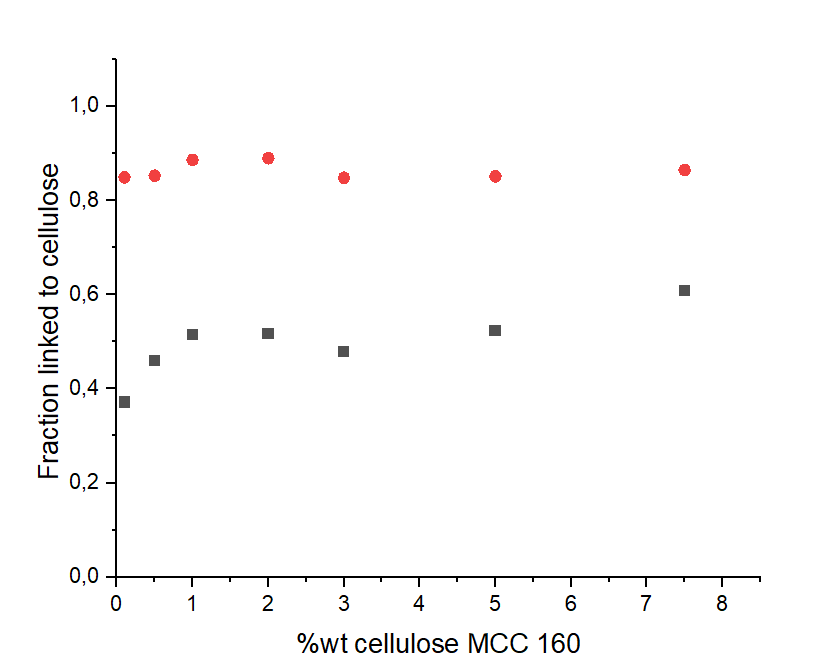


*Figure S17 fraction of water (red circles) and of TBP+ (black squares) linked to MCC 160*
